# Supplementary material for: S-Acylation controls functional coupling of BK channel pore-forming α-subunits and β1-subunits
Source: PubMed Central journal article supplement (PMC6690687; doi:10.1074/jbc.ra119.009065), 2019-06-18
Supplement: supp_RA119.009065_145144_2_supp_348845_pt8ycd.pdf [file supp_RA119.009065_145144_2_supp_348845_pt8ycd.pdf]

## SUPPORTING INFORMATION

### S-Acylation controls functional coupling of BK channel pore-forming $\alpha$ -subunits and $\beta$ 1-subunits

Peter J Duncan, Danlei Bi, Heather McClafferty, Lie Chen, Lijun Tian & Michael J Shipston

#### LIST OF MATERIALS

Figure S1

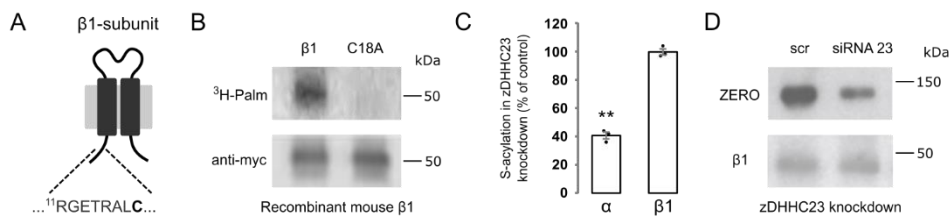

**Figure S1:  $\beta$ 1-subunit is S-acylated at Cys18 in HEK293 cells**

(A) Schematic of BK channel  $\beta$ 1-subunit indicating cysteine 18 (Cys18) at the intracellular interface of the first transmembrane domain. (B) Metabolic incorporation of <sup>3</sup>[H]-Palmitate in wild-type  $\beta$ 1-subunit but not in C18A mutant  $\beta$ 1-subunits expressed in HEK293 cells. (C) siRNA knockdown of zDHHC23 reduces S-acylation of  $\alpha$ -subunit but not  $\beta$ 1-subunit in HEK293 cells. (D) Representative blot showing reduced incorporation of <sup>3</sup>[H]-Palmitate in  $\alpha$ -subunits, but not  $\beta$ 1-subunits, of zDHHC23 siRNA-treated cells (siRNA 23) compared to scrambled siRNA (scr). Data are Means  $\pm$  SE (n = 3), \*\* p < 0.01 compared to scrambled siRNA control (t-test).
